# Supplementary material for: Activity Based High-Throughput Screening for Novel O-GlcNAc Transferase Substrates Using a Dynamic Peptide Microarray
Source: PLoS One. 2016 Mar 9;11(3):e0151085. doi: 10.1371/journal.pone.0151085 (PMC4784888; doi:10.1371/journal.pone.0151085)
Supplement: S2 Appendix — (XLSX) [file pone.0151085.s002.xlsx]

## Sheet: 90092 Array Layout
Hormone receptor interaction peptide
Row	Col	Peptide ID	Sequence	UniprotAccession	Description
1	1	CBP_2055_2077	SVQPPRSISPSALQDLLRTLKSP	Q92793	CREB-binding protein (EC 2.3.1.48).
1	2	CBP_345_368	TADPEKRKLIQQQLVLLLHAHKCQ	Q92793	CREB-binding protein (EC 2.3.1.48).
1	3	CBP_345_368_C367S	TADPEKRKLIQQQLVLLLHAHKSQ	Q92793	CREB-binding protein (EC 2.3.1.48).
1	4	CBP_57_80	GNLVPDAASKHKQLSELLRGGSGS	Q92793	CREB-binding protein (EC 2.3.1.48).
1	5	CHD9_2018_2040	QYQVALSASPLTSLPRLLDAKGI	Q3L8U1	Chromodomain-helicase-DNA-binding protein 9 (EC 3.6.1.-) (ATP-dependent helicase CHD9) (CHD-9) (Chromatin-related mesenchymalmodulator) (CReMM) (Chromatin-remodeling factor CHROM1) (Peroxisomalproliferator-activated receptor A-interacting complex 320 kDa protein)(PPAR-alpha-interacting complex protein 320 kDa) (Kismet homolog 2).
1	6	CNOT1_2086_2108	KPMQILYKGTLRVLLVLLHDFPE	A5YKK6	CCR4-NOT transcription complex subunit 1 (Negative regulator oftranscription subunit 1 homolog) (NOT1H) (hNOT1) (CCR4-associatedfactor 1).
1	7	CNOT1_557_579	LSRILDVAQDLKALSMLLNGTPF	A5YKK6	CCR4-NOT transcription complex subunit 1 (Negative regulator oftranscription subunit 1 homolog) (NOT1H) (hNOT1) (CCR4-associatedfactor 1).
1	8	NR0B1_136_159	GEDHPRQGSILYSLLTSSKQTHVA	P51843	Nuclear receptor subfamily 0 group B member 1 (Nuclear receptor DAX-1)(DSS-AHC critical region on the X chromosome protein 1).
1	9	NR0B1_68_90_C69S	FSGKDHPRQGSILYSMLTSAKQT	P51843	Nuclear receptor subfamily 0 group B member 1 (Nuclear receptor DAX-1)(DSS-AHC critical region on the X chromosome protein 1).
1	10	DHX30_241_262	QFPLPKNLLAKVIQIATSSSTA	Q7L2E3	Putative ATP-dependent RNA helicase DHX30 (EC 3.6.1.-) (DEAH boxprotein 30).
1	11	DHX30_49_70	EFPQPKNLLNSVIGRALGISHA	Q7L2E3	Putative ATP-dependent RNA helicase DHX30 (EC 3.6.1.-) (DEAH boxprotein 30).
1	12	EP300_2039_2061	SPLKPGTVSQQALQNLLRTLRSP	Q09472	Histone acetyltransferase p300 (EC 2.3.1.48) (E1A-associated proteinp300).
1	13	EP300_69_91	GMVQDAASKHKQLSELLRSGSSP	Q09472	Histone acetyltransferase p300 (EC 2.3.1.48) (E1A-associated proteinp300).
2	1	IKBB_277_299	PLGSAMLRPNPILARLLRAHGAP	Q15653	NF-kappa-B inhibitor beta (NF-kappa-BIB) (I-kappa-B-beta)(IkappaBbeta) (IkB-beta) (IkB-B) (Thyroid receptor-interacting protein9) (TRIP-9) (TR-interacting protein 9).
2	2	JHD2C_2054_2076	PLVSQNNEQGSTLRDLLTTTAGK	Q15652	Probable JmjC domain-containing histone demethylation protein 2C(EC 1.14.11.-) (Jumonji domain-containing protein 1C) (Thyroidreceptor-interacting protein 8) (TRIP-8).
2	3	KIF11_832_854_C854S	QWVSSLNEREQELHNLLEVVSQS	P52732	Kinesin-like protein KIF11 (Kinesin-related motor protein Eg5)(Kinesin-like spindle protein HKSP) (Thyroid receptor-interactingprotein 5) (TRIP-5) (Kinesin-like protein 1).
2	4	NCOA1_1421_1441	TSGPQTPQAQQKSLLQQLLTE	Q15788	Nuclear receptor coactivator 1 (EC 2.3.1.48) (NCoA-1) (Steroidreceptor coactivator 1) (SRC-1) (RIP160) (Protein Hin-2) (Renalcarcinoma antigen NY-REN-52).
2	5	NCOA1_620_643	SDGDSKYSQTSHKLVQLLTTTAEQ	Q15788	Nuclear receptor coactivator 1 (EC 2.3.1.48) (NCoA-1) (Steroidreceptor coactivator 1) (SRC-1) (RIP160) (Protein Hin-2) (Renalcarcinoma antigen NY-REN-52).
2	6	NCOA1_677_700	PSSHSSLTERHKILHRLLQEGSPS	Q15788	Nuclear receptor coactivator 1 (EC 2.3.1.48) (NCoA-1) (Steroidreceptor coactivator 1) (SRC-1) (RIP160) (Protein Hin-2) (Renalcarcinoma antigen NY-REN-52).
2	7	NCOA1_737_759	ASKKKESKDHQLLRYLLDKDEKD	Q15788	Nuclear receptor coactivator 1 (EC 2.3.1.48) (NCoA-1) (Steroidreceptor coactivator 1) (SRC-1) (RIP160) (Protein Hin-2) (Renalcarcinoma antigen NY-REN-52).
2	8	NCOA2_628_651	GQSRLHDSKGQTKLLQLLTTKSDQ	Q15596	Nuclear receptor coactivator 2 (NCoA-2) (Transcriptional intermediaryfactor 2).
2	9	NCOA2_677_700	STHGTSLKEKHKILHRLLQDSSSP	Q15596	Nuclear receptor coactivator 2 (NCoA-2) (Transcriptional intermediaryfactor 2).
2	10	NCOA2_733_755	EPVSPKKKENALLRYLLDKDDTK	Q15596	Nuclear receptor coactivator 2 (NCoA-2) (Transcriptional intermediaryfactor 2).
2	11	NCOA2_866_888	SQSTFNNPRPGQLGRLLPNQNLP	Q15596	Nuclear receptor coactivator 2 (NCoA-2) (Transcriptional intermediaryfactor 2).
2	12	NCOA3_104_123_N-KKK	KKKGQGVIDKDSLGPLLLQALDG	Q9Y6Q9	Nuclear receptor coactivator 3 (EC 2.3.1.48) (NCoA-3) (Thyroid hormonereceptor activator molecule 1) (TRAM-1) (ACTR) (Receptor-associatedcoactivator 3) (RAC-3) (Amplified in breast cancer-1 protein) (AIB-1)(Steroid receptor coactivator protein 3) (SRC-3) (CBP-interactingprotein) (pCIP).
2	13	NCOA3_609_631	QRGPLESKGHKKLLQLLTCSSDD	Q9Y6Q9	Nuclear receptor coactivator 3 (EC 2.3.1.48) (NCoA-3) (Thyroid hormonereceptor activator molecule 1) (TRAM-1) (ACTR) (Receptor-associatedcoactivator 3) (RAC-3) (Amplified in breast cancer-1 protein) (AIB-1)(Steroid receptor coactivator protein 3) (SRC-3) (CBP-interactingprotein) (pCIP).
3	1	NCOA3_609_631_C627S	QRGPLESKGHKKLLQLLTSSSDD	Q9Y6Q9	Nuclear receptor coactivator 3 (EC 2.3.1.48) (NCoA-3) (Thyroid hormonereceptor activator molecule 1) (TRAM-1) (ACTR) (Receptor-associatedcoactivator 3) (RAC-3) (Amplified in breast cancer-1 protein) (AIB-1)(Steroid receptor coactivator protein 3) (SRC-3) (CBP-interactingprotein) (pCIP).
3	2	NCOA3_673_695	MHGSLLQEKHRILHKLLQNGNSP	Q9Y6Q9	Nuclear receptor coactivator 3 (EC 2.3.1.48) (NCoA-3) (Thyroid hormonereceptor activator molecule 1) (TRAM-1) (ACTR) (Receptor-associatedcoactivator 3) (RAC-3) (Amplified in breast cancer-1 protein) (AIB-1)(Steroid receptor coactivator protein 3) (SRC-3) (CBP-interactingprotein) (pCIP).
3	3	NCOA3_MOUSE_1029_1051	HGSQNRPLLRNSLDDLLGPPSNA	O09000	Nuclear receptor coactivator 3 (EC 2.3.1.48) (NCoA-3) (Thyroid hormone receptor activator molecule 1) (TRAM-1) (ACTR) (Receptor-associated coactivator 3) (RAC-3) (Amplified in breast cancer-1 protein homolog) (AIB-1) (Steroid receptor coactivator protein 3) (SRC-3) (CBP-interacting protein) (p/CIP) (pCIP).
3	4	NCOA6_1479_1501	LVSPAMREAPTSLSQLLDNSGAP	Q14686	Nuclear receptor coactivator 6 (Amplified in breast cancer protein 3)(Cancer-amplified transcriptional coactivator ASC-2) (Activatingsignal cointegrator 2) (ASC-2) (Peroxisome proliferator-activatedreceptor-interacting protein) (PPAR-interacting protein) (PRIP)(Nuclear receptor-activating protein, 250 kDa) (Nuclear receptorcoactivator RAP250) (NRC RAP250) (Thyroid hormone receptor-bindingprotein).
3	5	NCOA6_875_897	PVNKDVTLTSPLLVNLLQSDISA	Q14686	Nuclear receptor coactivator 6 (Amplified in breast cancer protein 3)(Cancer-amplified transcriptional coactivator ASC-2) (Activatingsignal cointegrator 2) (ASC-2) (Peroxisome proliferator-activatedreceptor-interacting protein) (PPAR-interacting protein) (PRIP)(Nuclear receptor-activating protein, 250 kDa) (Nuclear receptorcoactivator RAP250) (NRC RAP250) (Thyroid hormone receptor-bindingprotein).
3	6	NCOR1_2039_2061_C2056S	MGQVPRTHRLITLADHISQIITQ	O75376	Nuclear receptor corepressor 1 (N-CoR1) (N-CoR).
3	7	NCOR2_2123_2145	APGVKGHQRVVTLAQHISEVITQ	Q9Y618	Nuclear receptor corepressor 2 (N-CoR2) (Silencing mediator ofretinoic acid and thyroid hormone receptor) (SMRT) (SMRTe) (Thyroid-,retinoic-acid-receptor-associated corepressor) (T3 receptor-associating factor) (TRAC) (CTG repeat protein 26) (SMAP270).
3	8	NCOR2_2330_2352	QAVQEHASTNMGLEAIIRKALMG	Q9Y618	Nuclear receptor corepressor 2 (N-CoR2) (Silencing mediator ofretinoic acid and thyroid hormone receptor) (SMRT) (SMRTe) (Thyroid-,retinoic-acid-receptor-associated corepressor) (T3 receptor-associating factor) (TRAC) (CTG repeat protein 26) (SMAP270).
3	9	NELFB_428_450	YVLHITKQRNKNALLRLLPGLVE	Q8WX92	Negative elongation factor B (NELF-B) (Cofactor of BRCA1).
3	10	NRIP1_120_142	VDSVPKGKQDSTLLASLLQSFSS	P48552	Nuclear receptor-interacting protein 1 (Nuclear factor RIP140)(Receptor-interacting protein 140).
3	11	NRIP1_121_143_P124R	DSVRKGKQDSTLLASLLQSFSSR	P48552	Nuclear receptor-interacting protein 1 (Nuclear factor RIP140)(Receptor-interacting protein 140).
3	12	NRIP1_173_195	KDLRCYGVASSHLKTLLKKSKVK	P48552	Nuclear receptor-interacting protein 1 (Nuclear factor RIP140)(Receptor-interacting protein 140).
3	13	NRIP1_173_195_C177S	KDLRSYGVASSHLKTLLKKSKVK	P48552	Nuclear receptor-interacting protein 1 (Nuclear factor RIP140)(Receptor-interacting protein 140).
4	1	NRIP1_368_390	RNNIKQAANNSLLLHLLKSQTIP	P48552	Nuclear receptor-interacting protein 1 (Nuclear factor RIP140)(Receptor-interacting protein 140).
4	2	NRIP1_488_510	KNSKLNSHQKVTLLQLLLGHKNE	P48552	Nuclear receptor-interacting protein 1 (Nuclear factor RIP140)(Receptor-interacting protein 140).
4	3	NRIP1_701_723	SEIENLLERRTVLQLLLGNPTKG	P48552	Nuclear receptor-interacting protein 1 (Nuclear factor RIP140)(Receptor-interacting protein 140).
4	4	NRIP1_805_831	PVSPQDFSFSKNGLLSRLLRQNQDSYL	P48552	Nuclear receptor-interacting protein 1 (Nuclear factor RIP140)(Receptor-interacting protein 140).
4	5	NRIP1_924_946	RSWARESKSFNVLKQLLLSENCV	P48552	Nuclear receptor-interacting protein 1 (Nuclear factor RIP140)(Receptor-interacting protein 140).
4	6	NRIP1_924_946_C945S	RSWARESKSFNVLKQLLLSENSV	P48552	Nuclear receptor-interacting protein 1 (Nuclear factor RIP140)(Receptor-interacting protein 140).
4	7	PELP1_168_190	LFRDISMNHLPGLLTSLLGLRPE	Q8IZL8	Proline-, glutamic acid- and leucine-rich protein 1 (Modulator of non-genomic activity of estrogen receptor) (Transcription factor HMX3).
4	8	PELP1_496_518_C496S	SPFFLQSLHGDGPLRLLLLPSIH	Q8IZL8-2	Proline-, glutamic acid- and leucine-rich protein 1 (Modulator of non-genomic activity of estrogen receptor) (Transcription factor HMX3).
4	9	PCAF_178_200	EEDADTKQVYFYLFKLLRKSILQ	Q92831	Histone acetyltransferase PCAF (EC 2.3.1.48) (P300/CBP-associatedfactor) (P/CAF) (Histone acetylase PCAF).
4	10	MED1_591_614	HGEDFSKVSQNPILTSLLQITGNG	Q15648	Mediator of RNA polymerase II transcription subunit 1 (Mediatorcomplex subunit 1) (Peroxisome proliferator-activated receptor-bindingprotein) (PBP) (PPAR-binding protein) (Thyroid hormone receptor-associated protein complex 220 kDa component) (Trap220) (Thyroidreceptor-interacting protein 2) (TRIP-2) (p53 regulatory proteinRB18A) (Vitamin D receptor-interacting protein complex componentDRIP205) (…
4	11	MED1_632_655	VSSMAGNTKNHPMLMNLLKDNPAQ	Q15648	Mediator of RNA polymerase II transcription subunit 1 (Mediatorcomplex subunit 1) (Peroxisome proliferator-activated receptor-bindingprotein) (PBP) (PPAR-binding protein) (Thyroid hormone receptor-associated protein complex 220 kDa component) (Trap220) (Thyroidreceptor-interacting protein 2) (TRIP-2) (p53 regulatory proteinRB18A) (Vitamin D receptor-interacting protein complex componentDRIP205) (…
4	12	PRGC1_134_154	PPQEAEEPSLLKKLLLAPANT	Q9UBK2	Peroxisome proliferator-activated receptor gamma coactivator 1-alpha(PPAR-gamma coactivator 1-alpha) (PPARGC-1-alpha) (PGC-1-alpha)(Ligand effect modulator 6).
4	13	CENPR_159_177	PHKASRHLDSYEFLKAILN	Q13352	Centromere protein R (CENP-R) (Nuclear receptor-interacting factor 3)(Integrin beta-3-binding protein) (Beta3-endonexin).
5	1	NR0B2_106_128	TFEVAEAPVPSILKKILLEEPSS	Q15466	Nuclear receptor subfamily 0 group B member 2 (Orphan nuclear receptorSHP) (Small heterodimer partner).
5	2	NR0B2_9_31_C9S/C11S	SPSQGAASRPAILYALLSSSLKA	Q15466	Nuclear receptor subfamily 0 group B member 2 (Orphan nuclear receptorSHP) (Small heterodimer partner).
5	3	TIP60_476_498	LSEDIVDGHERAMLKRLLRIDSK	Q92993	Histone acetyltransferase HTATIP (EC 2.3.1.48) (EC 2.3.1.-) (60 kDaTat interactive protein) (Tip60) (HIV-1 Tat interactive protein)(cPLA(2)-interacting protein).
5	4	TRIP4_149_171_C171S	FVNLYTRERQDRLAVLLPGRHPS	Q15650	Activating signal cointegrator 1 (ASC-1) (Thyroid receptor-interactingprotein 4) (TRIP-4).
5	5	UBE3A_396_418	DDEEPIPESSELTLQELLGEERR	Q05086	Ubiquitin-protein ligase E3A (EC 6.3.2.-) (E6AP ubiquitin-proteinligase) (Oncogenic protein-associated protein E6-AP) (Humanpapillomavirus E6-associated protein) (Renal carcinoma antigen NY-REN-54).
5	6	WIPI1_119_141	ESIYIHNIKDMKLLKTLLDIPAN	Q5MNZ9	WD repeat domain phosphoinositide-interacting protein 1 (WIPI-1) (WD40repeat protein interacting with phosphoinositides of 49 kDa) (WIPI 49kDa) (Atg18 protein homolog).
5	7	ZNHI3_89_111	LQNLKNLGESATLRSLLLNPHLR	Q15649	Zinc finger HIT domain-containing protein 3 (Thyroid receptor-interacting protein 3) (TRIP-3) (Thyroid hormone receptor interactor3) (HNF-4a coactivator).
5	8	ANDR_10_32	VYPRPPSKTYRGAFQNLFQSVRE	P10275	Androgen receptor (Dihydrotestosterone receptor) (Nuclear receptorsubfamily 3 group C member 4).
5	9	TGFI1_325_347_C334S/C346S	FHEREGRPYSRRDFLQLFAPRSQ	O43294	Transforming growth factor beta-1-induced transcript 1 protein(Hydrogen peroxide-inducible clone 5 protein) (Hic-5) (Androgenreceptor-associated protein of 55 kDa).
5	10	TGFI1_443_461_C452S/C455S	FQERAGKPYSQPSFLKLFG	O43294	Transforming growth factor beta-1-induced transcript 1 protein(Hydrogen peroxide-inducible clone 5 protein) (Hic-5) (Androgenreceptor-associated protein of 55 kDa).
5	11	BL1S1_1_11	MLSRLLKEHQA	P78537	Biogenesis of lysosome-related organelles complex-1 subunit 1 (BLOC-1subunit 1) (GCN5-like protein 1) (RT14 protein).
5	12	BRD8_254_276	TVAASPAASGAPTLSRLLEAGPT	Q9H0E9	Bromodomain-containing protein 8 (p120) (Skeletal muscle abundantprotein) (Skeletal muscle abundant protein 2) (Thyroid hormonereceptor coactivating protein 120kDa) (TrCP120).
5	13	CCND1_243_264_C243S/C247S	SLRASQEQIEALLESSLRQAQQ	P24385	G1/S-specific cyclin-D1 (PRAD1 oncogene) (BCL-1 oncogene).
6	1	CHD9_1023_1045	LLTGTPLQNTVEELFSLLHFLEP	Q3L8U1	Chromodomain-helicase-DNA-binding protein 9 (EC 3.6.1.-) (ATP-dependent helicase CHD9) (CHD-9) (Chromatin-related mesenchymalmodulator) (CReMM) (Chromatin-remodeling factor CHROM1) (Peroxisomalproliferator-activated receptor A-interacting complex 320 kDa protein)(PPAR-alpha-interacting complex protein 320 kDa) (Kismet homolog 2).
6	2	CHD9_855_877	KNGNQLREYQLEGLNWLLFNWYN	Q3L8U1	Chromodomain-helicase-DNA-binding protein 9 (EC 3.6.1.-) (ATP-dependent helicase CHD9) (CHD-9) (Chromatin-related mesenchymalmodulator) (CReMM) (Chromatin-remodeling factor CHROM1) (Peroxisomalproliferator-activated receptor A-interacting complex 320 kDa protein)(PPAR-alpha-interacting complex protein 320 kDa) (Kismet homolog 2).
6	3	CNOT1_140_162	DLRGFAAQFIKQKLPDLLRSYID	A5YKK6	CCR4-NOT transcription complex subunit 1 (Negative regulator oftranscription subunit 1 homolog) (NOT1H) (hNOT1) (CCR4-associatedfactor 1).
6	4	CNOT1_1929_1951_C1932S	RAKSYHNLDAFVRLIALLVKHSG	A5YKK6	CCR4-NOT transcription complex subunit 1 (Negative regulator oftranscription subunit 1 homolog) (NOT1H) (hNOT1) (CCR4-associatedfactor 1).
6	5	CNOT1_2083_2105	ELTKPMQILYKGTLRVLLVLLHD	A5YKK6	CCR4-NOT transcription complex subunit 1 (Negative regulator oftranscription subunit 1 homolog) (NOT1H) (hNOT1) (CCR4-associatedfactor 1).
6	6	DDX5_133_155	DMVGVAQTGSGKTLSYLLPAIVH	P17844	Probable ATP-dependent RNA helicase DDX5 (EC 3.6.1.-) (DEAD boxprotein 5) (RNA helicase p68).
6	7	CBP_345_367_C367S	TADPEKRKLIQQQLVLLLHAHKS	Q92793	CREB-binding protein (EC 2.3.1.48).
6	8	GELS_376_398	QVSVLPEGGETPLFKQFFKNWRD	P06396	Gelsolin precursor (Actin-depolymerizing factor) (ADF) (Brevin)(AGEL).
6	9	GNAQ_21_43	RQLRRDKRDARRELKLLLLGTGE	P50148	Guanine nucleotide-binding protein G(q) subunit alpha (Guaninenucleotide-binding protein alpha-q).
6	10	HAIR_553_575_C567S	GLAKHLLSGLGDRLSRLLRRERE	O43593	Protein hairless.
6	11	HAIR_745_767_C755S/C759S	EDRAGRGPLPSPSLSELLASTAV	O43593	Protein hairless.
6	12	IKBB_244_266	PLHLAVEAQAADVLELLLRAGAN	Q15653	NF-kappa-B inhibitor beta (NF-kappa-BIB) (I-kappa-B-beta)(IkappaBbeta) (IkB-beta) (IkB-B) (Thyroid receptor-interacting protein9) (TRIP-9) (TR-interacting protein 9).
6	13	ILK_131_153	KYGEMPVDKAKAPLRELLRERAE	Q13418	Integrin-linked protein kinase (EC 2.7.11.1) (ILK-1) (ILK-2) (59 kDaserine/threonine-protein kinase) (p59ILK).
7	1	MAPE_91_113	HLHLETFKAVLDGLDVLLAQEVR	P78395	Melanoma antigen preferentially expressed in tumors (Preferentiallyexpressed antigen of melanoma) (OPA-interacting protein 4) (OIP4).
7	2	MAPE_249_271	LAKFSPYLGQMINLRRLLLSHIH	P78395	Melanoma antigen preferentially expressed in tumors (Preferentiallyexpressed antigen of melanoma) (OPA-interacting protein 4) (OIP4).
7	3	MAPE_300_322	ALYVDSLFFLRGRLDQLLRHVMN	P78395	Melanoma antigen preferentially expressed in tumors (Preferentiallyexpressed antigen of melanoma) (OPA-interacting protein 4) (OIP4).
7	4	MAPE_382_404_C388S	DLVFDESGITDDQLLALLPSLSH	P78395	Melanoma antigen preferentially expressed in tumors (Preferentiallyexpressed antigen of melanoma) (OPA-interacting protein 4) (OIP4).
7	5	MGMT_86_108	HPVFQQESFTRQVLWKLLKVVKF	P16455	Methylated-DNA--protein-cysteine methyltransferase (EC 2.1.1.63) (6-O-methylguanine-DNA methyltransferase) (MGMT) (O-6-methylguanine-DNA-alkyltransferase).
7	6	MLL2_4175_4197	LLAGPRSEAGHLLLQKLLRAKNV	O14686	Myeloid/lymphoid or mixed-lineage leukemia protein 2 (ALL1-relatedprotein) (Lysine N-methyltransferase 2B).
7	7	MLL2_4702_4724	PRLKKWKGVRWKRLRLLLTIQKG	O14686	Myeloid/lymphoid or mixed-lineage leukemia protein 2 (ALL1-relatedprotein) (Lysine N-methyltransferase 2B).
7	8	NCOA3_725_747	EQLSPKKKENNALLRYLLDRDDP	Q9Y6Q9	Nuclear receptor coactivator 3 (EC 2.3.1.48) (NCoA-3) (Thyroid hormonereceptor activator molecule 1) (TRAM-1) (ACTR) (Receptor-associatedcoactivator 3) (RAC-3) (Amplified in breast cancer-1 protein) (AIB-1)(Steroid receptor coactivator protein 3) (SRC-3) (CBP-interactingprotein) (pCIP).
7	9	NCOA4_315_337	RKPENGSRETSEKFKLLFQSYNV	Q13772	Nuclear receptor coactivator 4 (NCoA-4) (70 kDa androgen receptorcoactivator) (70 kDa AR-activator) (Ret-activating protein ELE1).
7	10	NCOR1_1925_1946	TTITAANFIDVIITRQIASDKD	O75376	Nuclear receptor corepressor 1 (N-CoR1) (N-CoR).
7	11	NCOR1_662_684_C662S	SKNFYFNYKRRHNLDNLLQQHKQ	O75376	Nuclear receptor corepressor 1 (N-CoR1) (N-CoR).
7	12	NCOR1_2376_2398	SSTGSTQFPYNPLTMRMLSSTPP	O75376	Nuclear receptor corepressor 1 (N-CoR1) (N-CoR).
7	13	NCOR2_649_671_C649S	SKNFYFNYKKRQNLDEILQQHKL	Q9Y618	Nuclear receptor corepressor 2 (N-CoR2) (Silencing mediator ofretinoic acid and thyroid hormone receptor) (SMRT) (SMRTe) (Thyroid-,retinoic-acid-receptor-associated corepressor) (T3 receptor-associating factor) (TRAC) (CTG repeat protein 26) (SMAP270).
8	1	NELFB_328_350	QETLPRDSPDLLLLLRLLALGQG	Q8WX92	Negative elongation factor B (NELF-B) (Cofactor of BRCA1).
8	2	NELFB_80_102	IASEGKAEERYKKLEDLLEKSFS	Q8WX92	Negative elongation factor B (NELF-B) (Cofactor of BRCA1).
8	3	NRIP1_8_30	GSDVHQDSIVLTYLEGLLMHQAA	P48552	Nuclear receptor-interacting protein 1 (Nuclear factor RIP140)(Receptor-interacting protein 140).
8	4	NRIP1_253_275_C263S	PATSPKPSVASSQLALLLSSEAH	P48552	Nuclear receptor-interacting protein 1 (Nuclear factor RIP140)(Receptor-interacting protein 140).
8	5	NRIP1_488_510	KNSKLNSHQKVTLLQLLLGHKNE	P48552	Nuclear receptor-interacting protein 1 (Nuclear factor RIP140)(Receptor-interacting protein 140).
8	6	NRIP1_700_722	GSEIENLLERRTVLQLLLGNPNK	P48552	Nuclear receptor-interacting protein 1 (Nuclear factor RIP140)(Receptor-interacting protein 140).
8	7	NSD1_894_916	SSQNHIPIEPDYKFSTLLMMLKD	Q96L73	Histone-lysine N-methyltransferase, H3 lysine-36 and H4 lysine-20specific (EC 2.1.1.43) (H3-K36-HMTase) (H4-K20-HMTase) (Nuclearreceptor-binding SET domain-containing protein 1) (NR-binding SETdomain-containing protein) (Androgen receptor-associated coregulator267) (Lysine N-methyltransferase 3B).
8	8	NSD1_982_1004	GGDSALSGELSASLPGLLSDKRD	Q96L73	Histone-lysine N-methyltransferase, H3 lysine-36 and H4 lysine-20specific (EC 2.1.1.43) (H3-K36-HMTase) (H4-K20-HMTase) (Nuclearreceptor-binding SET domain-containing protein 1) (NR-binding SETdomain-containing protein) (Androgen receptor-associated coregulator267) (Lysine N-methyltransferase 3B).
8	9	PELP1_142_164	QDPPATMELAVAVLRDLLRYAAQ	Q8IZL8	Proline-, glutamic acid- and leucine-rich protein 1 (Modulator of non-genomic activity of estrogen receptor) (Transcription factor HMX3).
8	10	PELP1_251_273	SQGLKHTESWEQELHSLLASLHT	Q8IZL8	Proline-, glutamic acid- and leucine-rich protein 1 (Modulator of non-genomic activity of estrogen receptor) (Transcription factor HMX3).
8	11	PELP1_258_280	ESWEQELHSLLASLHTLLGALYE	Q8IZL8	Proline-, glutamic acid- and leucine-rich protein 1 (Modulator of non-genomic activity of estrogen receptor) (Transcription factor HMX3).
8	12	PELP1_20_42	GTGGLSAVSSGPRLRLLLLESVS	Q8IZL8	Proline-, glutamic acid- and leucine-rich protein 1 (Modulator of non-genomic activity of estrogen receptor) (Transcription factor HMX3).
8	13	PELP1_446_468	AGMLQGGASGEALLTHLLSDISP	Q8IZL8	Proline-, glutamic acid- and leucine-rich protein 1 (Modulator of non-genomic activity of estrogen receptor) (Transcription factor HMX3).
9	1	PELP1_56_78_C71S	VHPPNRSAPHLPGLMSLLRLHGS	Q8IZL8	Proline-, glutamic acid- and leucine-rich protein 1 (Modulator of non-genomic activity of estrogen receptor) (Transcription factor HMX3).
9	2	PELP1_571_593_C575S/C581S	TSSRSRRELYSLLLALLLAPSPR	Q8IZL8	Proline-, glutamic acid- and leucine-rich protein 1 (Modulator of non-genomic activity of estrogen receptor) (Transcription factor HMX3).
9	3	PAK6_248_270	SPKTRESSLKRRLFRSMFLSTAA	Q9NQU5	Serine/threonine-protein kinase PAK 6 (EC 2.7.11.1) (p21-activatedkinase 6) (PAK-6) (PAK-5).
9	4	PIAS2_6_28	ELRNMVSSFRVSELQVLLGFAGR	O75928	E3 SUMO-protein ligase PIAS2 (Protein inhibitor of activated STAT2)(Protein inhibitor of activated STAT x) (Msx-interacting zinc fingerprotein) (Miz1) (DAB2-interacting protein) (DIP) (Androgen receptor-interacting protein 3) (ARIP3) (PIAS-NY protein).
9	5	PNRC1_306_327	ENSNQNRELMAVHLKTLLKVQT	Q12796	Proline-rich nuclear receptor coactivator 1 (Proline-rich protein 2)(B4-2 protein).
9	6	PNRC2_118_139	SFNPSDKEIMTFQLKTLLKVQV	Q9NPJ4	Proline-rich nuclear receptor coactivator 2.
9	7	PR285_1062_1084	WPWDGELNADDAILRELLDESQK	Q9BYK8	Peroxisomal proliferator-activated receptor A-interacting complex 285kDa protein (EC 3.6.1.-) (ATP-dependent helicase PRIC285) (PPAR-alpha-interacting complex protein 285) (PPAR-gamma DNA-binding domain-interacting protein 1) (PPAR-gamma DBD-interacting protein 1) (PDIP1).
9	8	PR285_1105_1127	QQARLYENLPPAALRKLLRAEPE	Q9BYK8	Peroxisomal proliferator-activated receptor A-interacting complex 285kDa protein (EC 3.6.1.-) (ATP-dependent helicase PRIC285) (PPAR-alpha-interacting complex protein 285) (PPAR-gamma DNA-binding domain-interacting protein 1) (PPAR-gamma DBD-interacting protein 1) (PDIP1).
9	9	PR285_2216_2238_C2219S	ILYSGPSNKSVDVLAGLLLRRME	Q9BYK8	Peroxisomal proliferator-activated receptor A-interacting complex 285kDa protein (EC 3.6.1.-) (ATP-dependent helicase PRIC285) (PPAR-alpha-interacting complex protein 285) (PPAR-gamma DNA-binding domain-interacting protein 1) (PPAR-gamma DBD-interacting protein 1) (PDIP1).
9	10	PR285_432_454_C453S/C454S	EVRLERRASSGQALWLLLPARSS	Q9BYK8	Peroxisomal proliferator-activated receptor A-interacting complex 285kDa protein (EC 3.6.1.-) (ATP-dependent helicase PRIC285) (PPAR-alpha-interacting complex protein 285) (PPAR-gamma DNA-binding domain-interacting protein 1) (PPAR-gamma DBD-interacting protein 1) (PDIP1).
9	11	PRDM2_948_970	SPALQTPSLSSGQLPPLLIPTDP	Q13029	PR domain zinc finger protein 2 (PR domain-containing protein 2)(Retinoblastoma protein-interacting zinc finger protein) (Zinc fingerprotein RIZ) (MTE-binding protein) (MTB-ZF) (GATA-3-binding proteinG3B) (Lysine N-methyltransferase 8).
9	12	PRGR_102_124	SPPEKDSGLLDSVLDTLLAPSGP	P06401	Progesterone receptor (PR) (Nuclear receptor subfamily 3 group Cmember 3).
9	13	PRGR_42_64_C64S	SDTLPEVSAIPISLDGLLFPRPS	P06401	Progesterone receptor (PR) (Nuclear receptor subfamily 3 group Cmember 3).
10	1	PROX1_57_79	SVVQHADGEKSNVLRKLLKRANS	Q92786	Homeobox prospero-like protein PROX1 (PROX 1).
10	2	ZNT9_449_471	LLGRSIQPEQVQRLTELLENDPS	Q6PML9	Zinc transporter 9 (ZnT-9) (Solute carrier family 30 member 9) (Humanembryonic lung protein) (HUEL).
10	3	CENPR_1_18	MPVKRSLKLDGLLEENSF	Q13352	Centromere protein R (CENP-R) (Nuclear receptor-interacting factor 3)(Integrin beta-3-binding protein) (Beta3-endonexin).
10	4	PPRC1_151_173	DSELLVSPREGSSLHKLLTLSRT	Q5VV67	Peroxisome proliferator-activated receptor gamma coactivator-relatedprotein 1 (PGC-1-related coactivator) (PRC).
10	5	LCOR_40_62	TTSPTAATTQNPVLSKLLMADQD	Q96JN0	Ligand-dependent corepressor (LCoR) (Mblk1-related protein 2).
10	6	NRBF2_128_150	PEIQGIFDRDPDTLLYLLQQKSE	Q96F24	Nuclear receptor-binding factor 2 (NRBF-2) (Comodulator of PPAR andRXR).
10	7	RAD9A_348_370	EPSTVPGTPPPKKFRSLFFGSIL	Q99638	Cell cycle checkpoint control protein RAD9A (EC 3.1.11.2) (DNA repairexonuclease rad9 homolog A) (hRAD9).
10	8	TF65_437_459	SEALLQLQFDDEDLGALLGNSTD	Q04206	Transcription factor p65 (Nuclear factor NF-kappa-B p65 subunit).
10	9	TIF1A_373_395_C394S	TALLYSKRLITYRLRHLLRARSD	O15164	Transcription intermediary factor 1-alpha (TIF1-alpha) (Tripartitemotif-containing protein 24) (RING finger protein 82).
10	10	TIF1A_747_769	ESRPQNANYPRSILTSLLLNSSQ	O15164	Transcription intermediary factor 1-alpha (TIF1-alpha) (Tripartitemotif-containing protein 24) (RING finger protein 82).
10	11	TREF1_168_190	TQSAVMDGAPDSALRQLLSQKPM	Q96PN7	Transcriptional-regulating factor 1 (Transcriptional-regulatingprotein 132) (Zinc finger transcription factor TReP-132) (Zinc fingerprotein rapa) (Breast cancer anti-estrogen resistance 2).
10	12	TREF1_850_872	HSLFEAKGDVMVALEMLLLRKPV	Q96PN7	Transcriptional-regulating factor 1 (Transcriptional-regulatingprotein 132) (Zinc finger transcription factor TReP-132) (Zinc fingerprotein rapa) (Breast cancer anti-estrogen resistance 2).
10	13	TRRAP_3535_3557_C3535S/C3555S	SLTESRREERVLQLLRLLNPSLE	Q9Y4A5	Transformation/transcription domain-associated protein (350/400 kDaPCAF-associated factor) (PAF350/400) (STAF40) (Tra1 homolog).
11	1	TRRAP_971_993	LVAMMSLEDNKHALYQLLAHPNF	Q9Y4A5	Transformation/transcription domain-associated protein (350/400 kDaPCAF-associated factor) (PAF350/400) (STAF40) (Tra1 homolog).
11	2	TRXR1_132_154	GHGPTLKAYQEGRLQKLLKMNGP	Q16881	Thioredoxin reductase 1, cytoplasmic (EC 1.8.1.9) (TR) (Thioredoxinreductase TR1) (KM-102-derived reductase-like factor) (Gene associatedwith retinoid-IFN-induced mortality 12 protein) (GRIM-12).
11	3	WIPI1_313_335_C318S	GQRNISTLSTIQKLPRLLVASSS	Q5MNZ9	WD repeat domain phosphoinositide-interacting protein 1 (WIPI-1) (WD40repeat protein interacting with phosphoinositides of 49 kDa) (WIPI 49kDa) (Atg18 protein homolog).
11	4	CNOT1_1626_1648	IPPTLAMNPQAQALRSLLEVVVL	A5YKK6	CCR4-NOT transcription complex subunit 1 (Negative regulator oftranscription subunit 1 homolog) (NOT1H) (hNOT1) (CCR4-associatedfactor 1).
11	5	NR0B1_1_23	MAGENHQWQGSILYNMLMSAKQT	P51843	Nuclear receptor subfamily 0 group B member 1 (Nuclear receptor DAX-1)(DSS-AHC critical region on the X chromosome protein 1).
11	6	IKBB_62_84	LHLAVIHQHEPFLDFLLGFSAGT	Q15653	NF-kappa-B inhibitor beta (NF-kappa-BIB) (I-kappa-B-beta)(IkappaBbeta) (IkB-beta) (IkB-B) (Thyroid receptor-interacting protein9) (TRIP-9) (TR-interacting protein 9).
11	7	MAPE_454_476_C472S	TLHLERLAYLHARLRELLSELGR	P78395	Melanoma antigen preferentially expressed in tumors (Preferentiallyexpressed antigen of melanoma) (OPA-interacting protein 4) (OIP4).
11	8	MEN1_255_277	HTDSLELLQLQQKLLWLLYDLGH	O00255	Menin.
11	9	MTA1S_388_410_C393S/C396S	GAGRASESSYMSSLRILLDILEE	Q13330-2	Metastasis-associated protein MTA1.
11	10	L3R2A_12_34	WHNNVLHTHLVFFLPHLLNQPFS	Q9Y6C7	Loss of heterozygosity 3 chromosomal region 2 gene A protein.
11	11	NCOR1_2039_2061	MGQVPRTHRLITLADHICQIITQ	O75376	Nuclear receptor corepressor 1 (N-CoR1) (N-CoR).
11	12	NCOR1_2251_2273	GHSFADPASNLGLEDIIRKALMG	O75376	Nuclear receptor corepressor 1 (N-CoR1) (N-CoR).
11	13	NRIP1_1055_1077	EKDSPRLTKTNPILYYMLQKGGN	P48552	Nuclear receptor-interacting protein 1 (Nuclear factor RIP140)(Receptor-interacting protein 140).
12	1	PR285_1160_1182_C1163S	RLDSGMAFAGDEVLVQLLSGDKA	Q9BYK8	Peroxisomal proliferator-activated receptor A-interacting complex 285kDa protein (EC 3.6.1.-) (ATP-dependent helicase PRIC285) (PPAR-alpha-interacting complex protein 285) (PPAR-gamma DNA-binding domain-interacting protein 1) (PPAR-gamma DBD-interacting protein 1) (PDIP1).
12	2	PRGC1_130_155	DGTPPPQEAEEPSLLKKLLLAPANTQ	Q9UBK2	Peroxisome proliferator-activated receptor gamma coactivator 1-alpha(PPAR-gamma coactivator 1-alpha) (PPARGC-1-alpha) (PGC-1-alpha)(Ligand effect modulator 6).
12	3	PRGC2_338_358	AEFSILRELLAQDVLCDVSKP	Q86YN6	Peroxisome proliferator-activated receptor gamma coactivator 1-beta(PPAR-gamma coactivator 1-beta) (PGC-1-related estrogen receptor alphacoactivator) (PPARGC-1-beta) (PGC-1-beta).
12	4	NR0B2_237_257	FRPIIGDVDIAGLLGDMLLLR	Q15466	Nuclear receptor subfamily 0 group B member 2 (Orphan nuclear receptorSHP) (Small heterodimer partner).
12	5	NR0B2_201_223_C207S	EVLEPWSPAAQGRLTRVLLTAST	Q15466	Nuclear receptor subfamily 0 group B member 2 (Orphan nuclear receptorSHP) (Small heterodimer partner).
12	6	MAPE_356_378	LSGVMLTDVSPEPLQALLERASA	P78395	Melanoma antigen preferentially expressed in tumors (Preferentiallyexpressed antigen of melanoma) (OPA-interacting protein 4) (OIP4).
12	7	NCOA4_79_101_C101S	QLKEETLQQQAQQLYSLLGQFNS	Q13772	Nuclear receptor coactivator 4 (NCoA-4) (70 kDa androgen receptorcoactivator) (70 kDa AR-activator) (Ret-activating protein ELE1).
12	8	PRGC2_146_166	PAPEVDELSLLQKLLLATSYP	Q86YN6	Peroxisome proliferator-activated receptor gamma coactivator 1-beta(PPAR-gamma coactivator 1-beta) (PGC-1-related estrogen receptor alphacoactivator) (PPARGC-1-beta) (PGC-1-beta).
12	9	PPRC1_1159_1181	QAFISEIGIEASDLSSLLEQFEK	Q5VV67	Peroxisome proliferator-activated receptor gamma coactivator-relatedprotein 1 (PGC-1-related coactivator) (PRC).
12	10	RBL2_875_897_C879S/C894S	SIIQSPELMMDRHLDQLLMSAIY	Q08999	Retinoblastoma-like protein 2 (130 kDa retinoblastoma-associatedprotein) (p130) (PRB2) (RBR-2).
12	11	TRRAP_770_792	GSHDLLYQEFLPLLPNLLQGLNM	Q9Y4A5	Transformation/transcription domain-associated protein (350/400 kDaPCAF-associated factor) (PAF350/400) (STAF40) (Tra1 homolog).
12	12	UBE3A_649_671	RDLGDSHPVLYQSLKDLLEYEGN	Q05086	Ubiquitin-protein ligase E3A (EC 6.3.2.-) (E6AP ubiquitin-proteinligase) (Oncogenic protein-associated protein E6-AP) (Humanpapillomavirus E6-associated protein) (Renal carcinoma antigen NY-REN-54).
